# Supplementary material for: Higher expected returns for investors in the energy sector in Europe using an ESG strategy
Source: Frontiers journal article supplement (doi:10.3389/fenvs.2022.1031827), 2022-10-25
Supplement: Data_Sheet_1.xlsx [file Data_Sheet_1.xlsx]

## Sheet: __Solver__
20224171652789656152			5LBxZUPbbkaxXg02						1
3829.08	510.25	1892.85	208.891	37.6719	1.18556	115.981	96.5316	FALSE
-6.92223	2.36757	0.671907	2.91877	-5.9139	-0.391933	-0.18179	1.56264	-1.28174
ch4F	ch4F	ch4F	ch4F	ch4F	ch4F	ch4F	ch4F	ch4F

## Sheet: __Solver___conflict266076419
20224171652789655991			uHEL4aEvbk4auFuC

## Sheet: ROA
Company	Shell plc	TotalEnergies SE	BP plc	Equinor ASA	Eni S.p.A	Neste Oyj	Engie	E.ON SE	OMV Group
net income (000)
2018	23352000	11446000	9382000	7535000	4126000	778000	1033000	3223000	1516000
2019	15842000	11267000	4025000	1843000	148000	1788000	984000	1566000	1754000
2020	-21680000	-7242000	-20306000	-5510000	-8635000	712000	-1536000	1017000	1342000
2021	20101000	16032000	7563000	8563000	5821000	1771000	3661000	4691000	2187000
2022	21557000	17632000	-17488000	11422000	8548000	2034000	3661000	4691000	2071000
Total assets
2018	399194000	256762000	282176000	112508000	118373000	8224000	153702000	54324000	36961000
2019	404336000	273294000	295194000	118063000	123440000	9793000	159793000	98566000	40375000
2020	379267000	266132000	267654000	121972000	109648000	9815000	153182000	95385000	49271000
2021	404379000	293458000	287272000	147120000	137765000	12417000	225333000	119759000	53789000
2022	424987000	324579000	295512000	158919000	159402000	13740000	225333000	119759000	58550000
ROA
	Royal Dutch shell	Total Enegies SE	BP PLC	Equinor ASA	Eni SPA	Neste OYJ	Engie	E.on SE	OMV Group
2018	5.84979	4.45782	3.32488	6.6973	3.48559	9.46012	0.67208	5.93292	4.10162
2019	3.91803	4.12267	1.36351	1.56103	0.119896	18.2579	0.615797	1.58878	4.34427
2020	-5.71629	-2.72121	-7.58666	-4.51743	-7.8752	7.2542	-1.00273	1.06621	2.72371
2021	4.97083	5.46313	2.6327	5.82042	4.22531	14.2627	1.62471	3.91703	4.06589
2022	5.07239	5.43227	-5.91786	7.18731	5.36254	14.8035	1.62471	3.91703	3.53715
mean	3.32223
median	3.91703
stdv	5.16312
max	18.2579
min	-7.8752

## Sheet: ROE
Company	Shell plc	TotalEnergies SE	BP plc	Equinor ASA	Eni S.p.A	Neste Oyj	Engie	E.ON SE	OMV Group
net income (000)
2018	23352000	11446000	9382000	7535000	4126000	778000	1033000	3223000	1516000
2019	15842000	11267000	4025000	1843000	148000	1788000	984000	1566000	1754000
2020	-21680000	-7242000	-20306000	-5510000	-8635000	712000	-1536000	1017000	1342000
2021	20101000	16032000	7563000	8563000	5821000	1771000	3661000	4691000	2187000
2022	21557000	17632000	-17488000	11422000	8548000	2034000	3661000	4691000	2071000
Shareholder's Equity
2018	198646000	115640000	99444000	42970000	51016000	4628000	40942000	5758000	15341000
2019	186476000	116778000	98412000	41139000	47839000	5919000	38037000	9077000	16863000
2020	155310000	103702000	71250000	33873000	37415000	5925000	33856000	3359000	19898000
2021	171966000	111736000	75463000	39010000	44519000	6981000	33856000	11266000	21996000
2022	175998000	116480000	63299000	43233000	47366000	7003000	36993000	11266000	16635000
ROE
	Royal Dutch shell	Total Energies SE	BP PLC	Equinor ASA	Eni SPA	Neste OYJ	Engie	E.on SE	OMV Group
2018	0.117556	0.0989796	0.0943446	0.175355	0.0808766	0.168107	0.0252308	0.559743	0.0988202
2019	0.0849546	0.0964822	0.0408995	0.0447993	0.00309371	0.302078	0.0258695	0.172524	0.104015
2020	-0.139592	-0.0698347	-0.284996	-0.162666	-0.23079	0.120169	-0.0453686	0.302769	0.067444
2021	0.116889	0.143481	0.100221	0.219508	0.130753	0.253689	0.108134	0.416386	0.0994272
2022	0.122484	0.151374	-0.276276	0.264196	0.180467	0.290447	0.0989647	0.416386	0.124497
mean	0.106931
median	0.104015
stdv	0.166959
max	0.559743
min	-0.284996

## Sheet: ROS
Company	Shell plc	TotalEnergies SE	BP plc	Equinor ASA	Eni S.p.A	Neste Oyj	Engie	E.ON SE	OMV Group
Operating Income
2018	31189000	15262000	16341000	19384000	10119000	1023000	4227000	2103000	3233000
2019	22946000	15352000	16193000	8679000	7905000	2236000	4337000	1065000	3331000
2020	-25530000	-7265000	-573000	-3888000	269000	845000	3712000	1911000	1255000
2021	22283000	23925000	10672000	32951000	11075000	1987000	6427000	-11672000	5582000
2022	29130000	31201000	12149000	46054000	14597000	2301000	6427000	-11672000	7544000
Net sales
2018	388379000	184106000	298756000	78555000	75822000	14919000	60596000	29565000	22930000
2019	344877000	176249000	278397000	62911000	69881000	15839000	60058000	41003000	23460000
2020	180543000	119704000	180366000	45753000	43987000	11742000	55750000	60944000	16551000
2021	261504000	184634000	157739000	88744000	76575000	15148000	57866000	77358000	35555000
2022	290043000	209951000	172453000	88744000	94210000	17539000	57866000	77358000	44954000
ROS
	Royal Dutch shell	Total Energies SE	BP PLC	Equinor ASA	Eni SPA	Neste OYJ	Engie	E.on SE	OMV Group
2018	0.0803056	0.0828979	0.0546968	0.246757	0.133457	0.0685703	0.0697571	0.0711314	0.140994
2019	0.0665339	0.087104	0.0581651	0.137957	0.113121	0.141171	0.0722135	0.0259737	0.141986
2020	-0.141407	-0.0606914	-0.00317687	-0.084978	0.00611544	0.0719639	0.066583	0.0313567	0.0758262
2021	0.0852109	0.129581	0.0676561	0.371304	0.144629	0.131172	0.111067	-0.150883	0.156996
2022	0.100433	0.148611	0.0704482	0.518953	0.154941	0.131193	0.111067	-0.150883	0.167816
mean	0.0900822
median	0.0828979
stdv	0.114827
max	0.518953
min	-0.150883

## Sheet: ROI
Company	Shell plc	TotalEnergies SE	BP plc	Equinor ASA	Eni S.p.A	Neste Oyj	Engie	E.ON SE	OMV Group
Operating Income
2018	31189000	15262000	16341000	19384000	10119000	1023000	4227000	2103000	3233000
2019	22946000	15352000	16193000	8679000	7905000	2236000	4337000	1065000	3331000
2020	-25530000	-7265000	-573000	-3888000	269000	845000	3712000	1911000	1255000
2021	22283000	23925000	10672000	32951000	11075000	1987000	6427000	-11672000	5582000
2022	29130000	31201000	12149000	46054000	14597000	2301000	6427000	-11672000	7544000
Expenses
2018	343504000	140033000	269876000	47765000	62610000	13072000	32190000	22403000	17972000
2019	308122000	132218000	250814000	42736000	58980000	12739000	39950000	31764000	18213000
2020	193538000	100093000	170182000	36221000	40855000	9933000	34967000	46425000	14676000
2021	225655000	132626000	134879000	46879000	62612000	12335000	38861000	77313000	27241000
2022	246563000	149230000	147658000	52443000	75976000	14377000	38861000	77313000	33525000
ROI
	Royal Dutch shell	Total Energies SE	BP PLC	Equinor ASA	Eni SPA	Neste OYJ	Engie	E.on SE	OMV Group
2018	0.0907966	0.108989	0.06055	0.40582	0.16162	0.0782589	0.131314	0.0938714	0.179891
2019	0.0744705	0.116111	0.0645618	0.203084	0.134028	0.175524	0.108561	0.0335285	0.182891
2020	-0.131912	-0.0725825	-0.00336698	-0.107341	0.00658426	0.08507	0.106157	0.0411632	0.0855138
2021	0.0987481	0.180394	0.0791228	0.702895	0.176883	0.161086	0.165384	-0.150971	0.204912
2022	0.118144	0.20908	0.082278	0.878172	0.192126	0.160047	0.165384	-0.150971	0.225026
mean	0.131353
median	0.108989
stdv	0.179328
max	0.878172
min	-0.150971

## Sheet: ESG 
Company	Shell plc	TotalEnergies SE	BP plc	Equinor ASA	Eni S.p.A	Neste Oyj	Engie	E.ON SE	OMV Group
Environment Risk Score	19.4	12.9	17.1	15.8	13.1	11.2	12.8	5.1	11.9
Social Risk Score	7.8	8.7	9.5	9.6	6.2	4.8	8.1	7.8	6.9
Governance Risk Score	7.9	7.7	8.8	6.6	7.9	4.3	8.1	5.4	8.1
Total ESG Risk score	35.1	29.3	35.4	32	27.2	20.3	29	18.3	26.9
mean	28.1667
median	29
stdv	5.90381
max	35.4
min	18.3

## Sheet: SARIMA summary
Quarter	Shell plc	TotalEnergies SE	BP plc	EQUINOR ASA	Eni S.p.A	NESTE Oyj	ENGIE SA	E.ON SE	OMV GROUP
Q1 2017	73.331	36.083	56.386	15.528	19.75	3.238	19.75	11.169	5.82
Q2 2017	72.702	34.482	57.366	12.935	17.361	3.458	17.361	10.012	5.43
Q3 2017	77.733	37.082	60.808	13.609	18.55	3.405	18.55	9.818	4.9
Q4 2017	88.124	41.442	70.022	17.115	24.565	3.834	24.565	11.912	5.17
Q1 2018	91.1114	43.292	69.143	19.884	22.208	3.826	22.208	11.468	5.25
Q2 2018	99.268	46.102	76.907	18.135	22.471	3.938	22.471	9.032	6.01
Q3 2018	101.548	48.4	80.803	19.136	23.147	4.095	23.147	8.347	5.91
Q4 2018	104.626	46.312	76.855	22.438	22.038	3.86	22.038	6.069	7
Q1 2019	85.662	45.124	67.407	16.482	21.354	3.972	21.354	10.18	5.69
Q2 2019	91.838	45.202	73.747	17.096	21.157	4.275	21.157	7.602	6.36
Q3 2019	89.541	42.538	69.292	15.61	18.861	4.175	18.861	8.198	6.27
Q4 2019	85.065	43.385	72.17	15.169	18.194	4.272	18.194	19.944	6.4
Q1 2020	60.959	38.577	30.862	15.13	15.54	3.447	15.54	19.488	5.03
Q2 2020	32.491	21.562	20.776	7.603	9.254	2.711	9.254	14.136	3.31
Q3 2020	44.717	27.217	26.263	11.339	12.298	3.3037	12.298	14.976	3.9
Q4 2020	45.028	32.348	31.176	11.746	14.252	3.191	14.252	21.016	5.22
Q1 2021	59.115	36.633	36.492	17.589	17.842	3.301	17.842	22.185	6.78
Q2 2021	61.764	41.633	37.598	17.426	20.05	3.185	20.05	17.637	7.66
Q3 2021	61.555	69.07	37.867	23.264	22.704	4.243	22.704	17.743	8.97
Q4 2021	90.233	55.298	52.238	32.609	31.415	5.236	31.415	33.95	14.068
Q1 2022	83.164	63.95	51.22	36.393	36.465	5.821	36.465	29.507	16.68
Q2 2022	74.6811	72.5846	54.5848	37.1461	38.7984	5.83944	38.7984	25.0619	17.6197
Q3 2022	102.015	100.035	55.6151	43.0713	41.5862	7.23026	41.5862	25.8214	19.4592
Q4 2022	114.859	84.8769	69.3399	52.8505	44.5216	8.39595	44.5216	42.2908	24.8968
Q1 2023	111.597	93.6135	67.948	56.3839	47.0385	9.22013	47.0385	38.1816	27.7485

## Sheet: SARIMA Shell
SHELL PLC						SARIMA Model				Model coefficients
Quarter	Revenues	Difference	Time	Season difference
Q1 2017	73.331					Time	Data	Residual		cont	-6.92223
Q2 2017	72.702	-0.629				1	8.7856	0		phi 1	-0.463505
Q3 2017	77.733	5.031				2	-2.751	0		theta 1	-3.0348
Q4 2017	88.124	10.391				3	-7.313	0		Phi 1	-1.64439
Q1 2018	91.1114	2.9874				4	-21.9514	0		Theta 1	-0.189556
Q2 2018	99.268	8.1566	1			5	-1.9806	0
Q3 2018	101.548	2.28	2	-2.751		6	-4.577	3.59973		SSE	3829.08
Q4 2018	104.626	3.078	3	-7.313		7	-7.554	-5.95096
Q1 2019	85.662	-18.964	4	-21.9514		8	94.858	38.5485
Q2 2019	91.838	6.176	5	-1.9806		9	-134.644	13.2443
Q3 2019	89.541	-2.297	6	-4.577		10	14.523	-9.12271
Q4 2019	85.065	-4.476	7	-7.554		11	4.787	-28.3539
Q1 2020	60.959	-24.106	8	-5.142		12	-61.807	22.2421
Q2 2020	32.491	-28.468	9	-34.644		13	131.117	8.11849
Q3 2020	44.717	12.226	10	14.523		14	-12.435	-8.19153
Q4 2020	45.028	0.311	11	4.787		15	28.367	23.4801
Q1 2021	59.115	14.087	12	38.193		16	-21.156	-7.28729
Q2 2021	61.764	2.649	13	31.117			-111.319
Q3 2021	61.555	-0.209	14	-12.435			275.43
Q4 2021	90.233	28.678	15	28.367			-158.34
Q1 2022	83.164	-7.069	16	-21.156			38.0706
Q2 2022	74.6811	-8.48294	17	-11.1319
Q3 2022	102.015	27.334	18	27.543
Q4 2022	114.859	12.844	19	-15.834
Q1 2023	111.597	-3.26194	20	3.80706
Forecast
Quarter	Revenues	Difference	Season Difference
Q4 2020	45.028
Q1 2021	59.115	14.087
Q2 2021	61.764	2.649
Q3 2021	61.555	-0.209
Q4 2021	90.233	28.678
Q1 2022	83.164	-7.069	-21.156
Q2 2022	74.6811	-8.48294	-11.1319
Q3 2022	102.015	27.334	27.543
Q4 2022	114.859	12.844	-15.834
Q1 2023	111.597	-3.26194	3.80706

## Sheet: SARIMA Total 
TotalEnergies SE	(Billion $)					SARIMA Model				Model coefficients
Quarter	Revenues	Difference	Time	Season difference
Q1 2017	36.083					Time	Data	Residual		cont	2.36757
Q2 2017	34.482	-1.601				1	4.411	0		phi 1	-0.0560376
Q3 2017	37.082	2.6				2	-0.302	0		theta 1	0.624513
Q4 2017	41.442	4.36				3	-6.448	0		Phi 1	0.733652
Q1 2018	43.292	1.85				4	-3.038	0		Theta 1	-2.06042
Q2 2018	46.102	2.81	1	4.411		5	-2.732	0
Q3 2018	48.4	2.298	2	-0.302		6	-4.962	-7.44245		SSE	510.25
Q4 2018	46.312	-2.088	3	-6.448		7	2.935	9.68028
Q1 2019	45.124	-1.188	4	-3.038		8	-3.62	-9.37464
Q2 2019	45.202	0.078	5	-2.732		9	-17.093	-11.6796
Q3 2019	42.538	-2.664	6	-4.962		10	8.319	0.705784
Q4 2019	43.385	0.847	7	2.935		11	4.284	10.3614
Q1 2020	38.577	-4.808	8	-3.62		12	9.093	-3.82966
Q2 2020	21.562	-17.015	9	-17.093		13	22.015	-0.890004
Q3 2020	27.217	5.655	10	8.319		14	21.782	2.22877
Q4 2020	32.348	5.131	11	4.284		15	-18.903	-2.66987
Q1 2021	36.633	4.285	12	9.093		16	4.367	1.2022
Q2 2021	41.633	5	13	22.015			36.3456
Q3 2021	69.07	27.437	14	21.782			1.36517
Q4 2021	55.298	-13.772	15	-18.903			-13.8626
Q1 2022	63.95	8.652	16	4.367			0.845468
Q2 2022	72.5846	8.63456		3.63456
Q3 2022	100.035	27.4507		0.0136517
Q4 2022	84.8769	-15.1583		-1.38626
Q1 2023	93.6135	8.73655		0.0845468
Forecast
Quarter	Revenues	Difference	Season Difference
Q4 2020	32.348
Q1 2021	36.633	4.285
Q2 2021	41.633	5
Q3 2021	69.07	27.437
Q4 2021	55.298	-13.772
Q1 2022	63.95	8.652	4.367
Q2 2022	72.5846	8.63456	3.63456
Q3 2022	100.035	27.4507	0.0136517
Q4 2022	84.8769	-15.1583	-1.38626
Q1 2023	93.6135	8.73655	0.0845468

[truncated: 7 more sheets: SARIMA BP, SARIMA Equinor, SARIMA ENI SpA, SARIMA Neste OYJ, SARIMA Engie, SARIMA E.ON SE, SARIMA OMV group]
